# Supplementary material for: Effects of the urban heat island on the phenology of Odonata in London, UK
Source: PubMed Central journal article supplement (PMC5486733; doi:10.1007/s00484-017-1311-7), 2017-02-11
Supplement: 484_2017_1311_MOESM1_ESM.pdf [file 484_2017_1311_MOESM1_ESM.pdf]

**Supplementary material:**

**Effects of the urban heat island on the phenology of Odonata in London, UK**

*International Journal of Biometeorology*

Giovanna Villalobos-Jiménez†\*, Christopher Hassall†

†School of Biology, University of Leeds, Woodhouse Lane, Leeds UK LS7 1SW

\* Corresponding author: [bsgdjv@leeds.ac.uk](mailto:bsgdjv@leeds.ac.uk)

Table S1. Variance Inflation Factors (VIF) of the predictor variables used in the FGLS models by species.

| Species                         | Urban land use | Minimum temperature | Year  |
|---------------------------------|----------------|---------------------|-------|
| <i>Aeshna cyanea</i>            | 1.232          | 1.796               | 1.564 |
| <i>Aeshna grandis</i>           | 1.095          | 1.124               | 1.029 |
| <i>Aeshna mixta</i>             | 1.082          | 1.217               | 1.134 |
| <i>Anax imperator</i>           | 1.171          | 1.283               | 1.112 |
| <i>Calopteryx splendens</i>     | 1.064          | 1.112               | 1.048 |
| <i>Coenagrion puella</i>        | 1.036          | 1.086               | 1.050 |
| <i>Enallagma cyathigerum</i>    | 1.064          | 1.128               | 1.064 |
| <i>Erythromma najas</i>         | 1.038          | 1.095               | 1.057 |
| <i>Ischnura elegans</i>         | 1.097          | 1.228               | 1.131 |
| <i>Libellula quadrimaculata</i> | 1.057          | 1.108               | 1.051 |
| <i>Orthetrum cancellatum</i>    | 1.092          | 1.094               | 1.002 |
| <i>Pyrrhosoma nymphula</i>      | 1.068          | 1.160               | 1.092 |
| <i>Sympetrum striolatum</i>     | 1.173          | 1.307               | 1.134 |

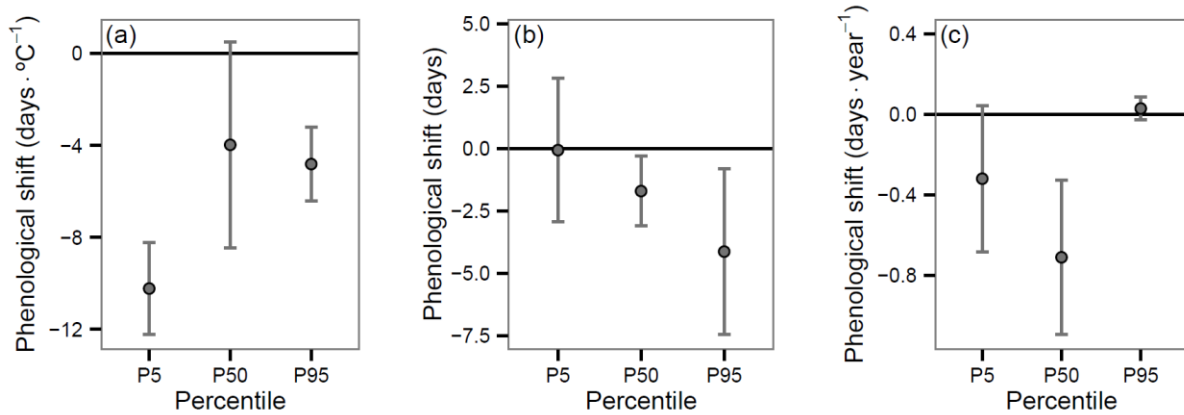

Figure S1. Community-level shifts excluding anisopterans in flight dates (P5, P50, P95) in relation to (a) minimum temperature, (b) urban land use compared to the rural surroundings, and (c) year. Error bars represent 95% confidence intervals.
